# Supplementary material
Source: PubMed Central journal article supplement (PMC3411361)
Supplement: Supp_Data.pdf [file Supp_Data.pdf]

## Supplementary Data

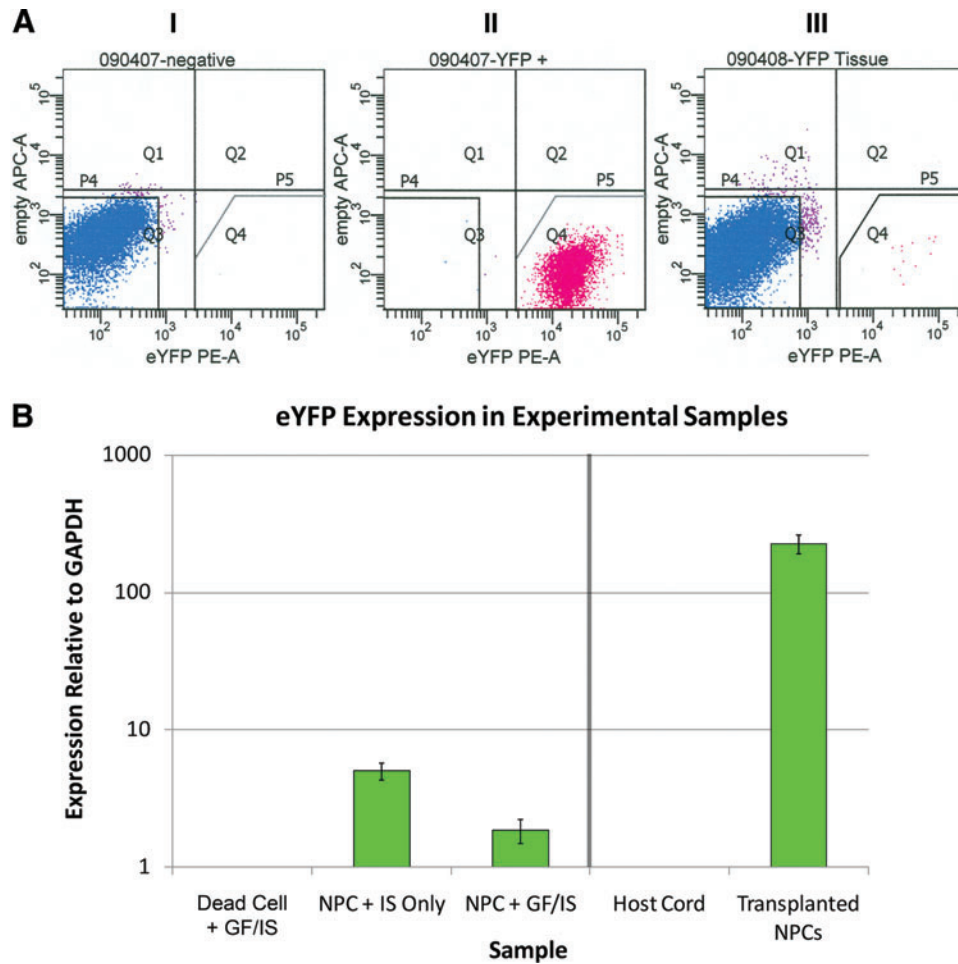

**SUPPLEMENTARY FIG. S1.** Isolation of NPCs from transplanted tissue and verification of transplant success. **(A)** Isolation of *eYFP*-bearing cells using FACS is demonstrated. **I** and **II** denote negative and positive controls, respectively. **III** shows isolation of *eYFP* positive cells from a host spinal cord 1 week post-transplant. **(B)** *eYFP* expression data are shown for experimental specimens on a logarithmic scale. Specificity of *eYFP* primers is demonstrated by lack of expression in the *Dead Cell + GF/IS* group as well as the *eYFP* negative 'Host Cord' FACS specimen.

**Sample sizes:** *Dead Cell + GF/IS*  $n=4$ , *NPC + IS Only*  $n=3$ , *NPC + GF/IS*  $n=3$ ; qPCR was performed in quadruplicate. NPCs, neural precursor cells; *eYFP*, enhanced yellow fluorescent protein; FACS, fluorescent-activated cell sorting; qPCR, quantitative polymerase chain reaction.

SUPPLEMENTARY TABLE S1. SAMPLE SIZES

| Group                | Sample size<br>(qPCR) | Sample size<br>(Western blot) |
|----------------------|-----------------------|-------------------------------|
| Paradigm 1           |                       |                               |
| NPC transplanted     | 4                     |                               |
| Control              | 3                     |                               |
| Paradigm 2           |                       |                               |
| Uninjured            | 3                     | 3                             |
| Injured no treatment | 3                     | 4                             |
| Injured + GF/IS      | 3                     | 3                             |
| Dead Cell + GF/IS    | 4                     | 3                             |
| NPC + IS Only        | 3                     | 3                             |
| NPC + GF/IS          | 3                     | 6                             |
| FACS                 | 3                     |                               |
| Paradigm 3           |                       |                               |
| BMSC transplanted    | 3 <sup>a</sup>        |                               |
| Control              | 3                     |                               |

<sup>a</sup>For this group, 4 animals were transplanted; however, qPCR indicated unsuccessful transplantation for one animal. This animal was excluded from further trophin analysis.

NPC, neural precursor cell; BMSC, bone marrow stromal cell; FACS, fluorescence-activated cell sorting; qPCR, quantitative polymerase chain reaction.

SUPPLEMENTARY TABLE S2. EMPLOYED QUANTITATIVE POLYMERASE CHAIN REACTION PRIMER SEQUENCES

| Gene                       | Forward primer sequence           | Reverse primer sequence    |
|----------------------------|-----------------------------------|----------------------------|
| <i>GAPDH</i> <sup>a</sup>  | GGCAAATTCAACGGCACA                | GTTAGTGGGGTCTCGTCTCTG      |
| <i>eGFP</i>                | TGACCCTGAAGTTCATCTGCACCA          | TCTTGTAGTTGCCGTCGTCTTGA    |
| <i>eYFP</i>                | GAA GTT CAT CTG CAC CAC CGG CAA G | GGTAGCTCAGGTAGTGGTTGTCTG   |
| <i>NGF</i> <sup>a</sup>    | ACTTCCAGGCCCATGGTACAATCT          | TTGATGTCCGTGGCTGTGGTCTTA   |
| <i>BDNF</i> <sup>a</sup>   | TGGCAGTGCAGGAGGAATTTCTGA          | GCAGAAGGCCTAAGCAACTTGACA   |
| <i>NT3</i> <sup>a</sup>    | ACTACGGCAACAGAGACGCTACAA          | ATAGCGTTTCCCTCCGTGGTGATGT  |
| <i>NT4/5</i> <sup>a</sup>  | TGCGTCAGTACTTCTTCGAGACGC          | TAGCCTTGCATTCTGAGAGCCAGT   |
| <i>GDNF</i> <sup>a</sup>   | AGAATTCCAGAGGGAAAGGTCGCA          | TCCTCCTTGGTTTCGTAGCCCAAA   |
| <i>CNTF</i> <sup>a</sup>   | TACCAGTGGCAAGCACTGATCGTT          | GGCAAAGGCAGAAACTTGGAGCAT   |
| <i>PDGF-A</i> <sup>a</sup> | ATCCCCGAGTTTGCAAGACCA             | CCAGATCAAGAAGTTGGCCGATGT   |
| <i>EGF</i> <sup>a</sup>    | TTTCATCCTTTGCCTGGTTGTGCC          | AAATTTCCAGAGCCTAAGAGCCC    |
| <i>bFGF</i> <sup>a</sup>   | TTCAAGGATCCCAAGCGGCTCTA           | TGTGGGTCGCTCTTCTCCC        |
| <i>LIF</i> <sup>a</sup>    | TGCCAATGGGACAGAGAAGACCAA          | TACTTGTGTCACAGACGGCAAAGC   |
| <i>IGF-1</i> <sup>a</sup>  | TGGCACTCTGCTTGCTCACCTTTA          | TTGGTCCACACACGAACTGAAGAG   |
| <i>GGF2</i> <sup>a</sup>   | TAGTCACAGCTGGAGTAATGGGCA          | TGGCATGCCTGAGGAAGCTGTTAT   |
| <i>TGF-β1</i> <sup>a</sup> | GTGGCCAGATCCTGTCCAAACTAA          | CATTAGCACGCGGGTGACTTCTTT   |
| <i>VEGF-A</i> <sup>a</sup> | TATTGCCGTCCAATTGAGACCCTG          | GCACACAGGACGGCTTGAAGATATAC |
| <i>IL-1β</i>               | AAGACACGGGTTCCATGGTGAAGT          | TGGTACATCAGCACCTCTCAAGCA   |
| <i>IL-6</i>                | TGGCTAAGGACCAAGACCATCCAA          | AGCACACTAGGTTTGCCGAGTAGA   |
| <i>TNF-α</i>               | ACCAGCAGATGGGCTGTACCTTAT          | ATGAAATGGCAAATCGGCTGACGG   |

<sup>a</sup>Denotes that the primer sequence presented was previously published (Hawryluk et al., Stem Cells and Development, 2011).
